# Supplementary material
Source: PubMed Central journal article supplement (PMC3918916)

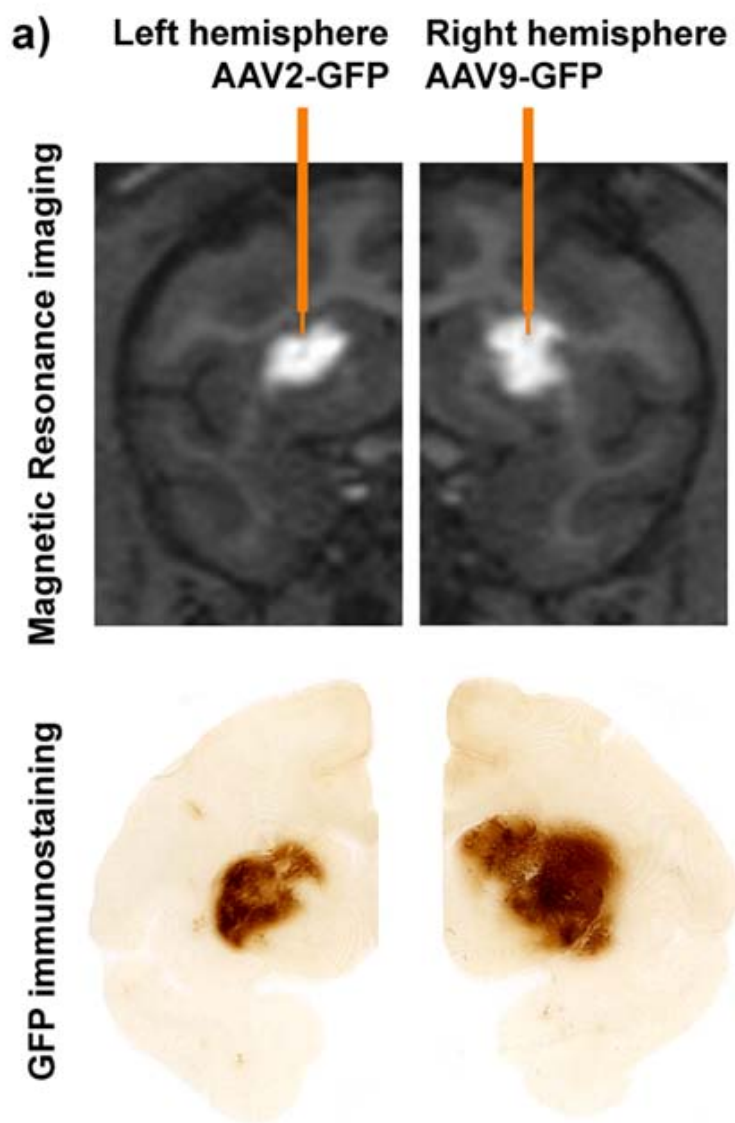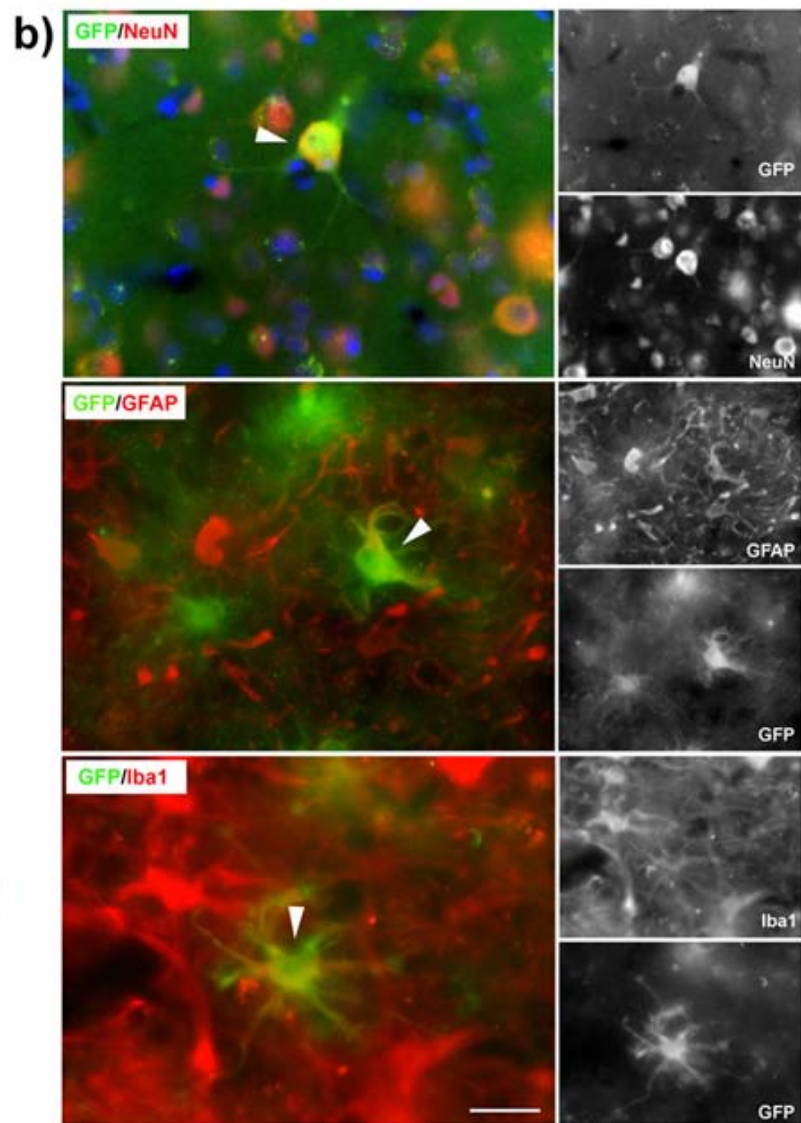

Left hemisphere (AAV2-GFP)

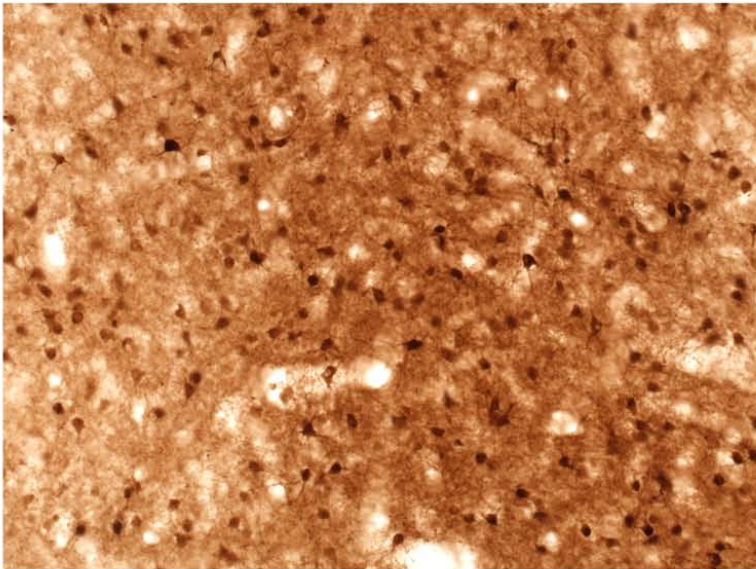

Right hemisphere (AAV9-GFP)

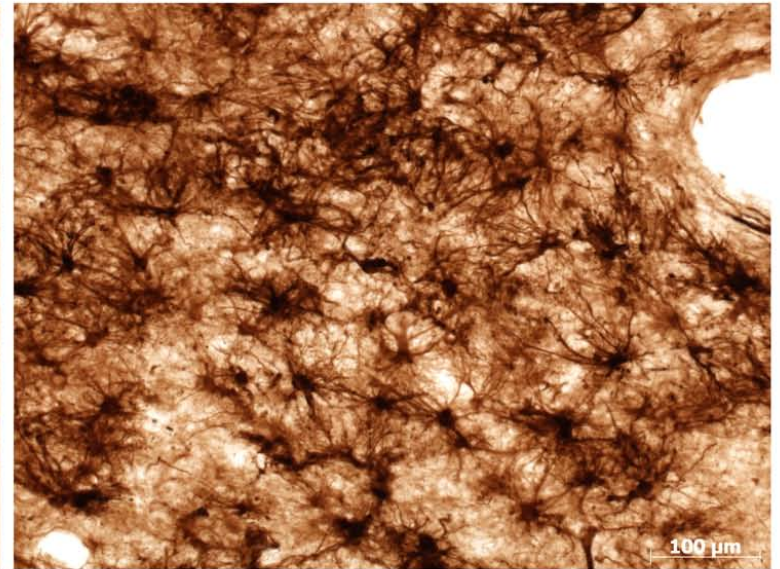

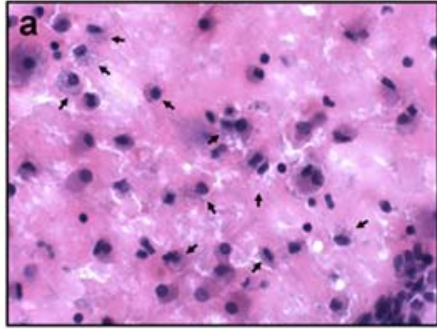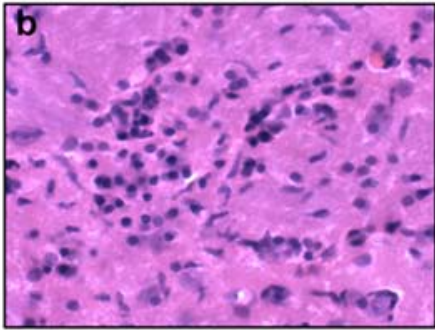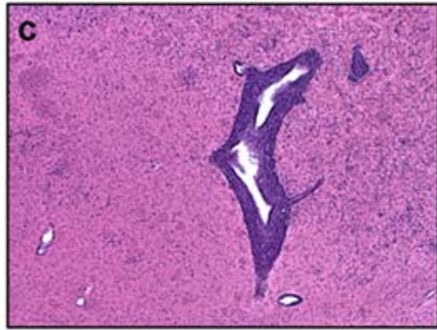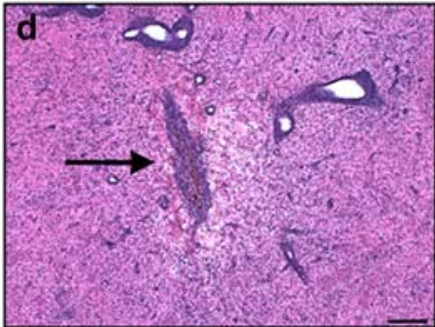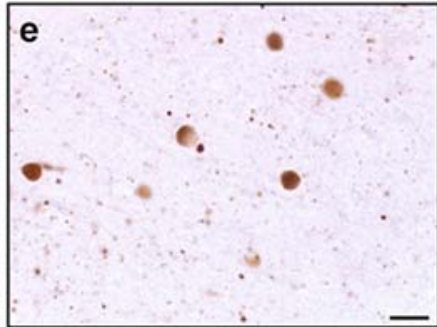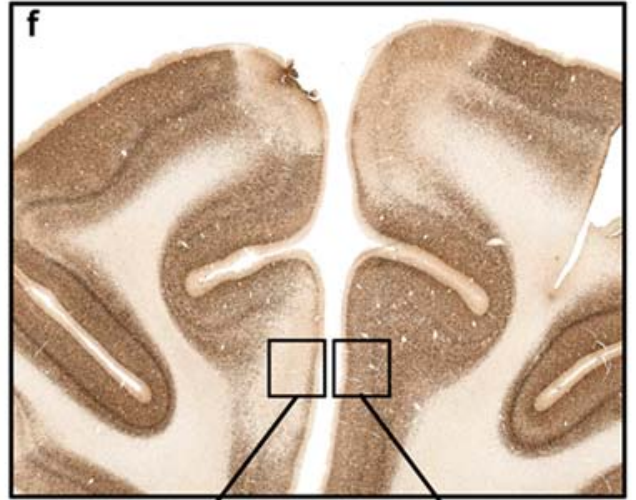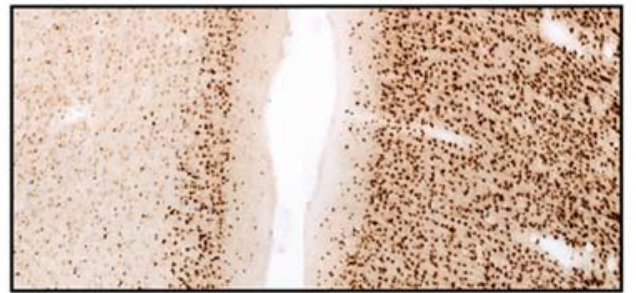

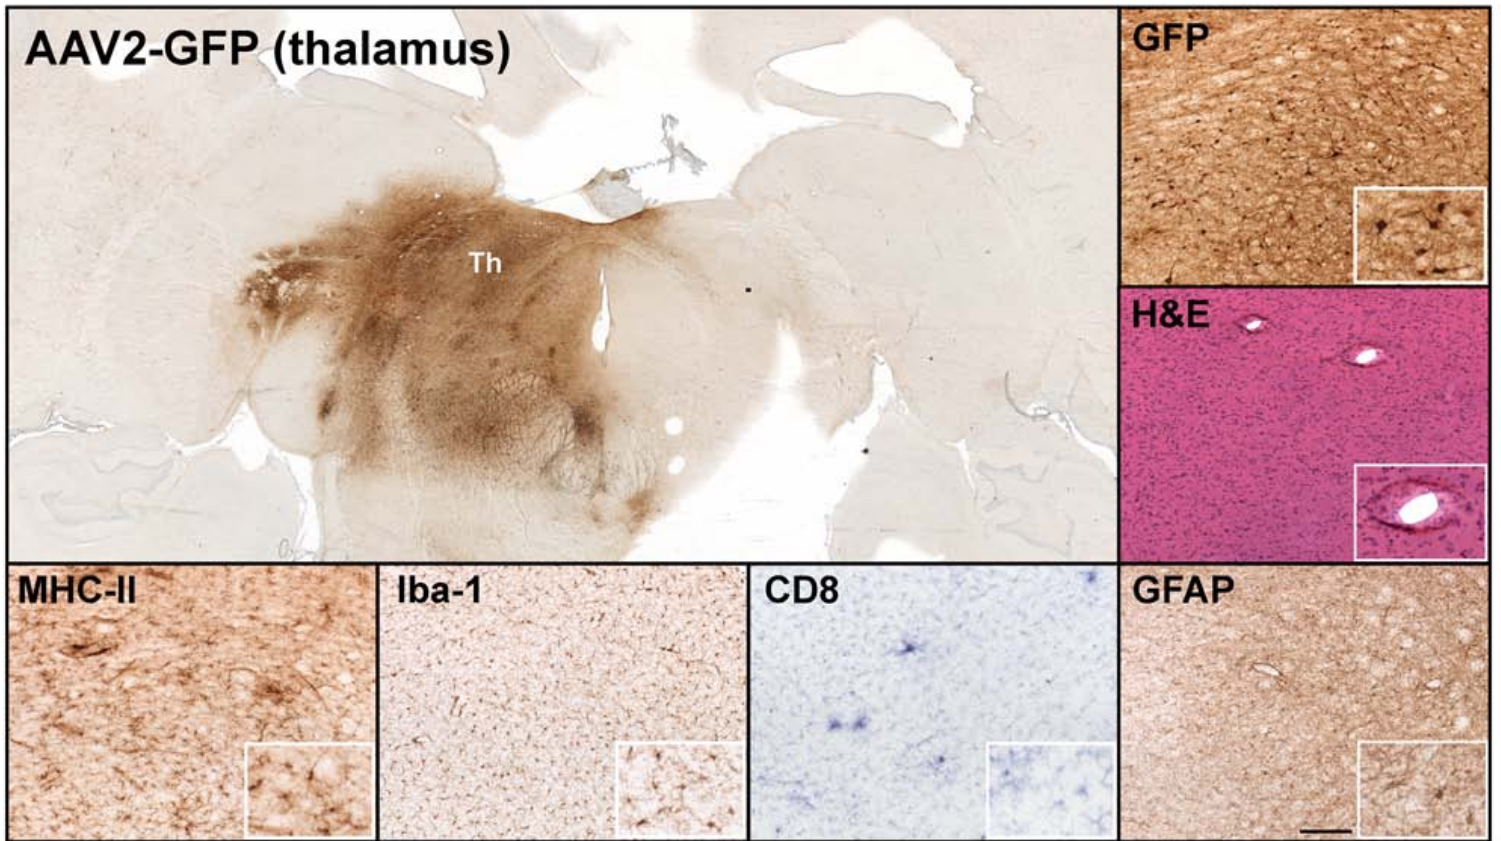

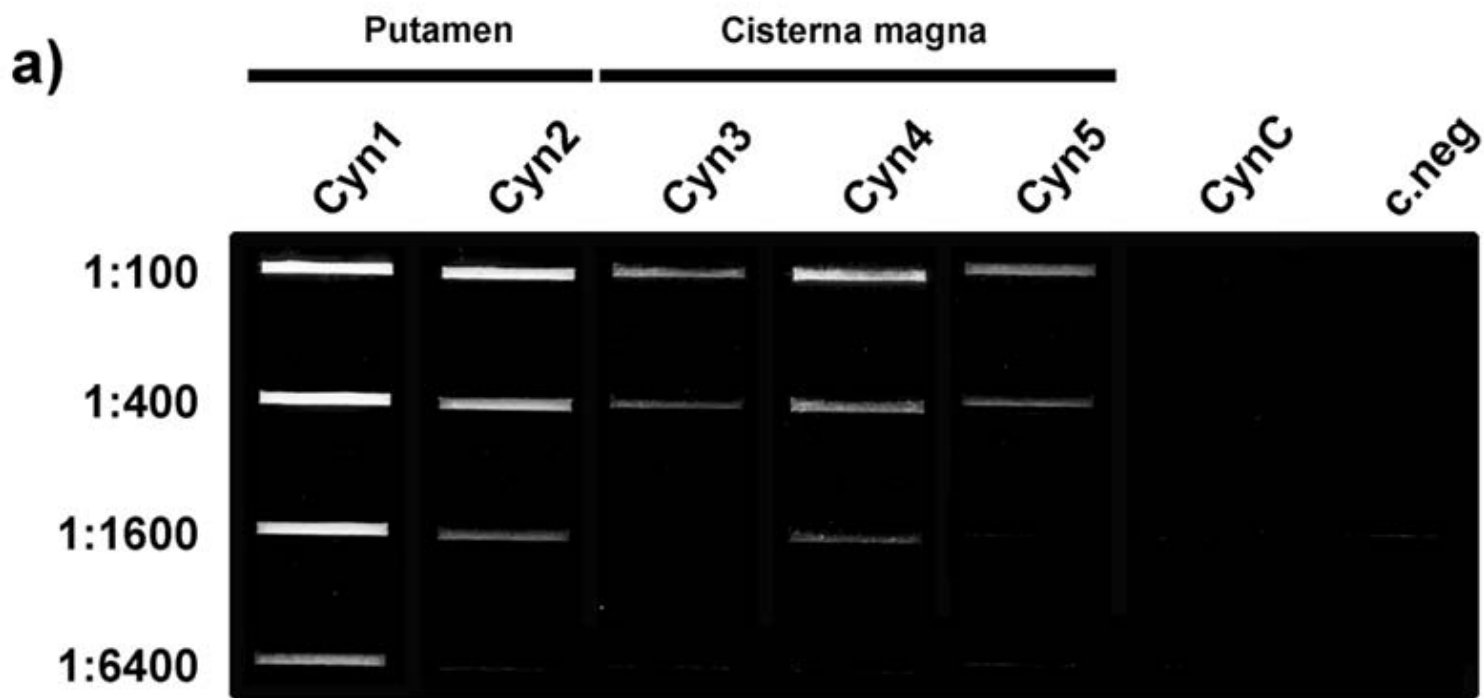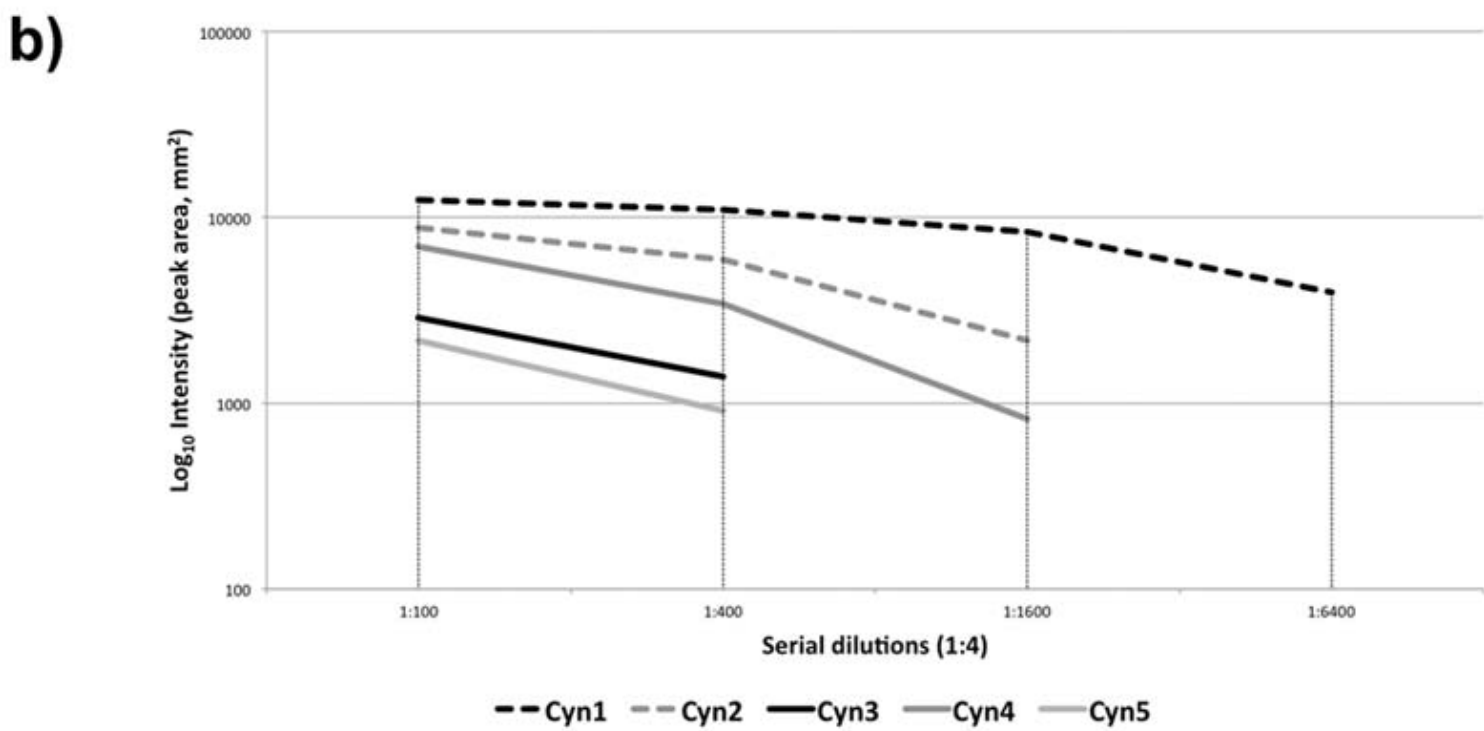

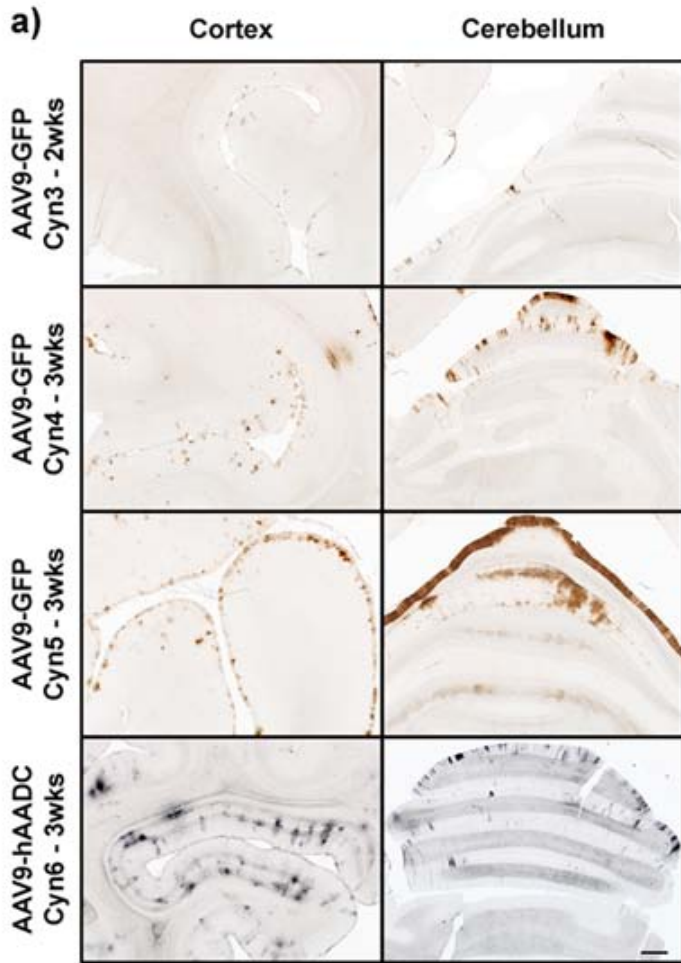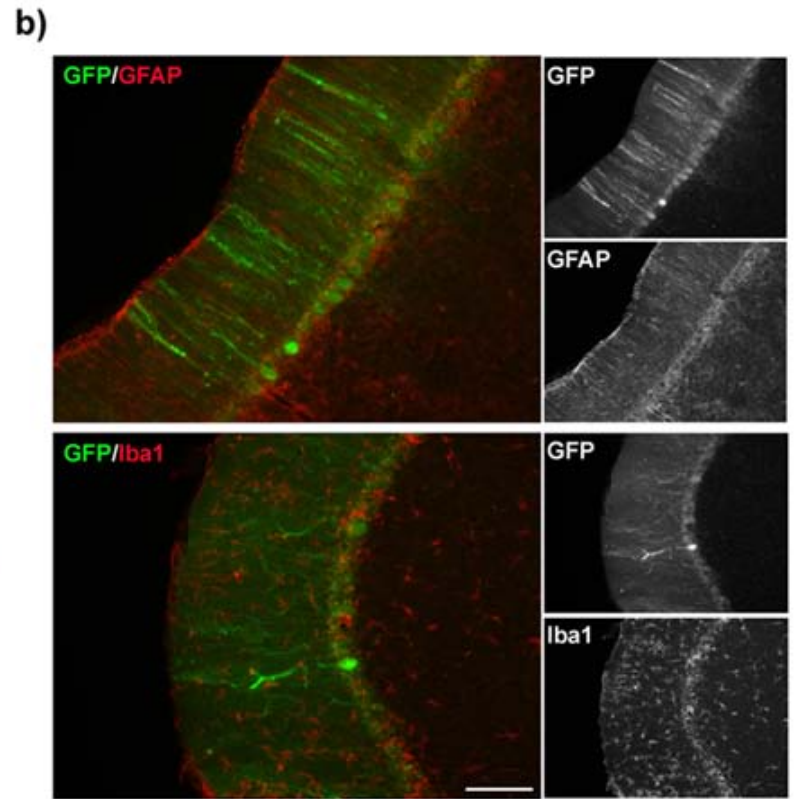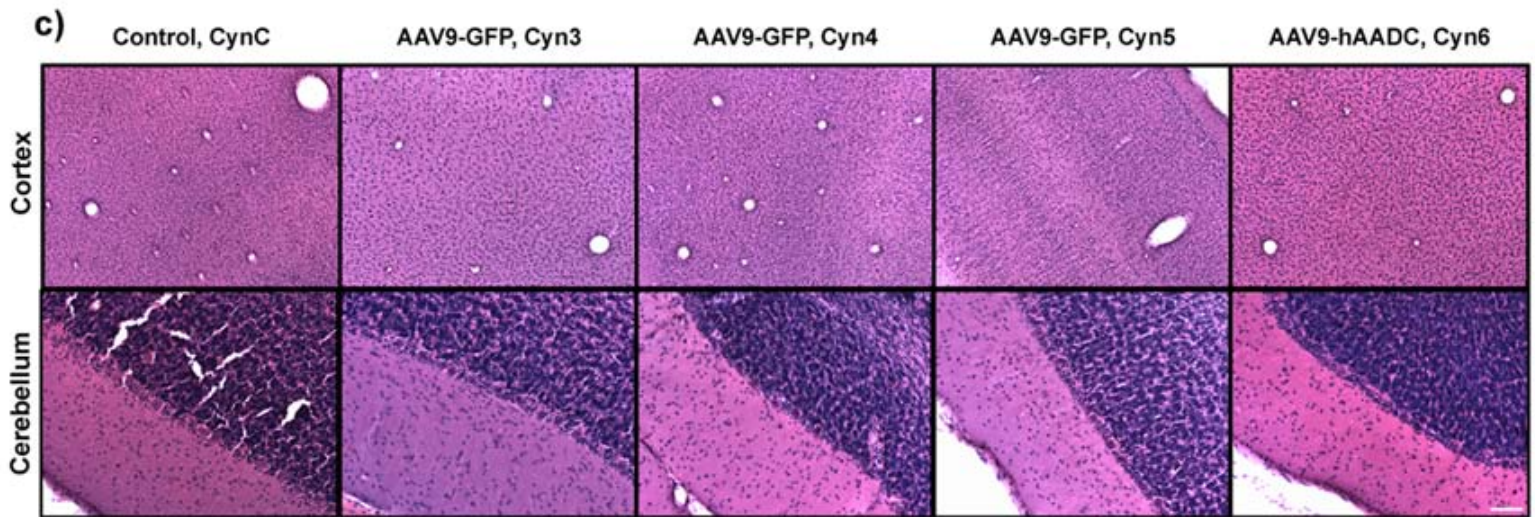

**GFAP**

**MHC-II**

**Iba1**

**Control  
CynC**

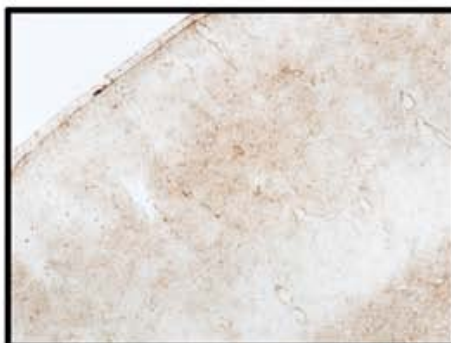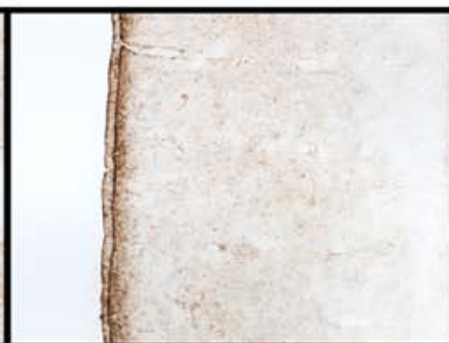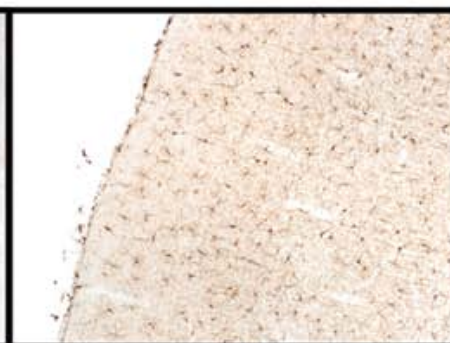

**AAV9-GFP  
Cyn3**

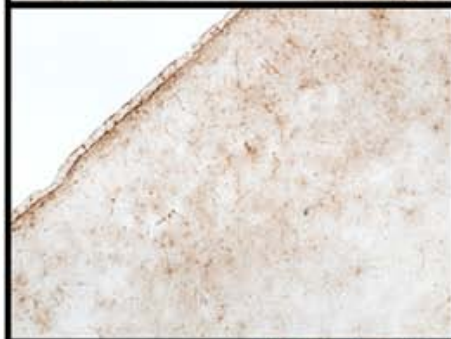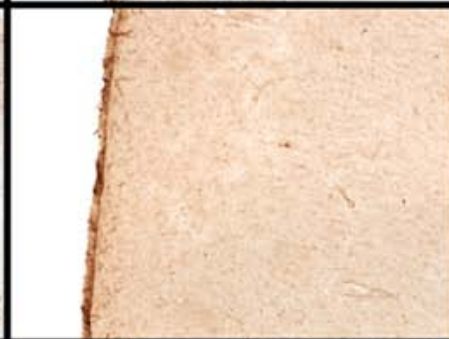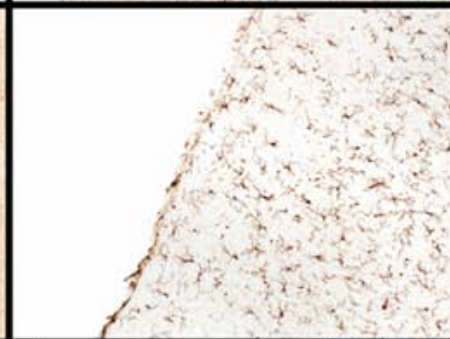

**AAV9-GFP  
Cyn4**

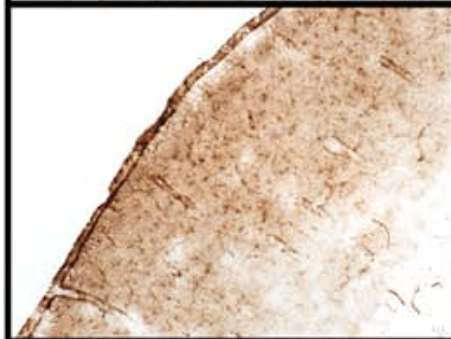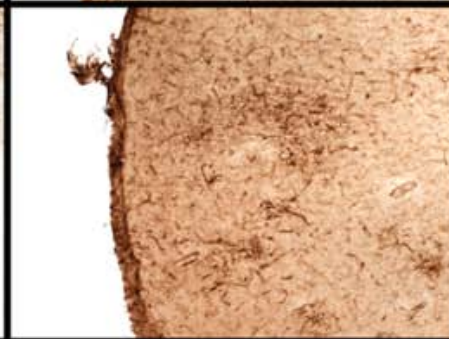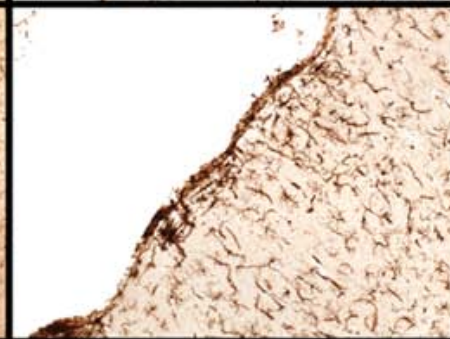

**AAV9-GFP  
Cyn5**

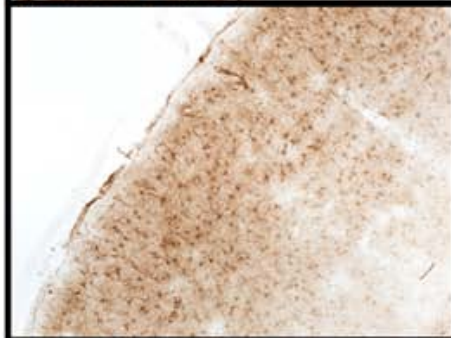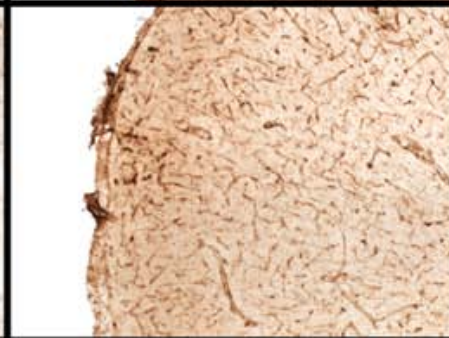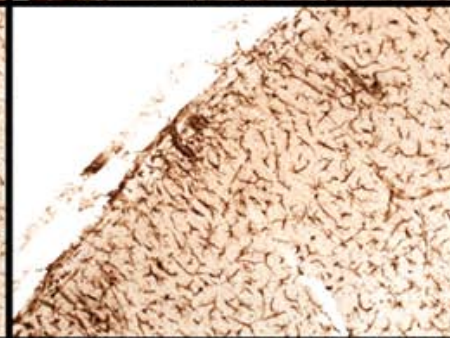

**AAV9-hAADC  
Cyn6**

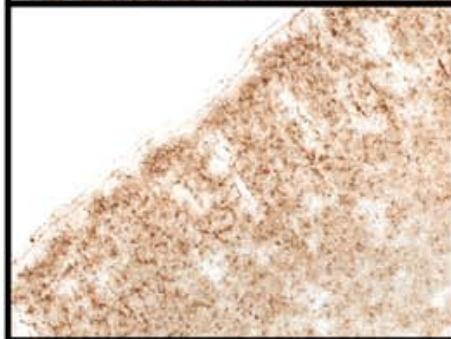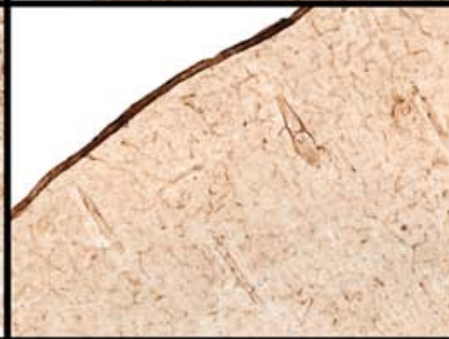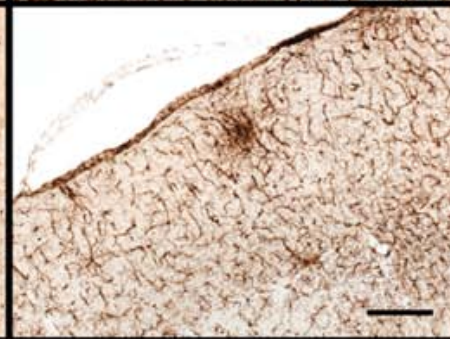

Supplement: mt2013266x1.pdf [file mt2013266x1.pdf]
